# Supplementary material for: Real-Time Monitoring of Volatile Compounds Losses in the Oven during Baking and Toasting of Gluten-Free Bread Doughs: A PTR-MS Evidence
Source: PubMed Central journal article supplement (PMC7588997; doi:10.3390/foods9101498), 2020-10-20
Supplement: foods-09-01498-s001.pdf [file foods-09-01498-s001.pdf]

## **Real-time monitoring of volatile compounds losses in the oven during baking and toasting of gluten-free bread doughs: a PTR-MS evidence**

Joana Pico <sup>a,1\*</sup>, Iuliia Khomenko <sup>b</sup>, Vittorio Capozzi <sup>c</sup>, Luciano Navarini <sup>d</sup>, Franco Biasioli <sup>b</sup>

<sup>a</sup> I.U. Cinquima, Analytical Chemistry Group, University of Valladolid, Paseo de Belén Street 7, 47011 Valladolid, Spain.

<sup>b</sup> Research and Innovation Centre, Fondazione Edmund Mach, via E. Mach 1, San Michele all'Adige (TN), Italy

<sup>c</sup> Institute of Sciences of Food Production, National Research Council (CNR), c/o CS-DAT, Via Michele Protano, 71121 Foggia, Italy.

<sup>d</sup> Illycaffè S.p.a, Via Flavia, 110, 34147, Trieste (Italy).

\*Corresponding author: Joana Pico

<sup>1</sup> Current affiliation: Wine Research Center, Applied Biology Department, The University of British Columbia, 2205 East Mall, V6T 1Z4, Vancouver, BC, Canada

e-mail: joana.picocarbajo@ubc.ca

**Table Supplementary 1.** Fast GC-PTR-ToF-MS parameters of the 39 volatile compounds standards selected as important contributors to bread aroma, including the m/z and retention times.

| <b>Volatile compound</b> | <b>m/z</b> | <b>Ret Time (s)</b> |
|--------------------------|------------|---------------------|
| 3-Methyl-1-butanol       | 71.0856    | 84.7                |
| 2-Methyl-1-butanol       |            | 83.7                |
| 1-Pentanol               |            | 93.0                |
| Hexanal                  | 83.0863    | 90.1                |
| 1-Hexanol                | 85.1010    | 100.3               |
| Furfural                 | 97.0288    | 107.0               |
| 5-Methylfurfural         | 111.0451   | 111.7               |
| Pyrazine                 | 81.0369    | 95.9                |
| 2,3-Butanedione          | 87.0443    | 80.3                |
| Phenylacetaldehyde       | 121.0680   | 112.7               |
| 2-Ethyl-3-methylpyrazine | 123.0826   | 100.1               |
| 2-Acetylpyrazine         |            | 114.6               |
| 2-Ethylpyrazine          | 109.0711   | 102.0               |
| 2,3-Dimethylpyrazine     |            | 103.6               |
| 2,5-Dimethylpyrazine     |            | 99.5                |
| 2,6-Dimethylpyrazine     |            | 102.3               |
| Benzyl alcohol           |            | 99.5                |
| Butanoic acid            | 89.0599    | 119.1               |
| Heptanal                 | 97.1028    | 89.3                |
| 1-Octen-3-ol             | 111.1181   | 96.7                |
| 2-Acetyl-1-pyrroline     | 112.0759   | 105.0               |
| 2,3-Diethylpyrazine      | 137.0983   | 101.9               |
| Nonanal                  | 125.1339   | 104.3               |
| 2,4-(E,E)-Decadienal     | 135.1221   | 119.1               |
| Ethyl octanoate          | 173.1577   | 100.5               |
| Ethyl hexanoate          | 145.1239   | 93.0                |

**Table Supplementary 1. Continued**

| <b>Volatile compound</b> | <b>m/z</b> | <b>Ret Time(s)</b> |
|--------------------------|------------|--------------------|
| Ethyl hexanoate          | 145.1239   | 93.0               |
| 1-Methylpyrrol           | 82.0700    | 85.6               |
| Limonene                 | 137.1354   | 89.3               |
| 3-Penten-2-ol            | 69.0702    | 96.7               |
| Benzaldehyde             | 107.0518   | 104.2              |
| Hexyl acetate            | 145.1239   | 104.2              |
| Acetic acid              | 61.0280    | nd*                |
| Furfuryl alcohol         | 81.0369    | nd*                |
| Acetoin                  | 89.0599    | nd*                |
| 3-Methylbutanoic acid    | 103.0704   | nd*                |
| 2-Methylbutanoic acid    | 103.0704   | nd*                |
| Phenylethyl alcohol      | 105.0721   | nd*                |
| Hexanoic acid            | 117.0921   | nd*                |

\* nd means “not detected”

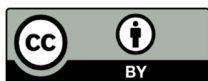

© 2020 by the authors. Licensee MDPI, Basel, Switzerland. This article is an open access article distributed under the terms and conditions of the Creative Commons Attribution (CC BY) license (<http://creativecommons.org/licenses/by/4.0/>).
